# Supplementary material for: Long-Term Consequences of Worsened Poststroke Status in Patients With Premorbid Disability: Implications for Treatment
Source: PubMed Central journal article supplement (PMC6159688; doi:10.1161/strokeaha.118.022416), 2018-09-10
Supplement: str-49-2430-s001.pdf [file str-49-2430-s001.pdf]

## SUPPLEMENTAL MATERIAL

## SUPPLEMENTARY TABLES

Table I. Association of age, sex, and socio-economic deprivation with mild-to-moderate pre-morbid disability (mRS of 2 to 4) in patients with ischaemic stroke, excluding those with extremely severe disability, mRS=5.

|                     | Pre-morbid mRS 2-4  |          |
|---------------------|---------------------|----------|
|                     | aOR (95%CI)         | p> z     |
| Age                 | 1.09<br>(1.08-1.10) | <0.0001  |
| Female sex          | 1.61<br>(1.27-2.03) | <0.0001  |
| ≥Median deprivation | 2.09<br>(1.64-2.67) | <0.0001  |
| AUC                 | 0.78                |          |
| N                   | 1,582               |          |
| p> X <sup>2</sup>   |                     | <0.0001* |

**Table II – Impact of the change in mRS from pre-stroke to 3-months post-stroke ( $\Delta$ mRS) on 1-year and 5-year mortality, institutionalization, and death/institutionalization for 3-month survivors of ischaemic stroke with pre-morbid mRS of 2 – controlling for age, sex, and National Institutes of Health Stroke Scale (NIHSS) score at acute presentation. The institutionalization analyses exclude pre-morbidly institutionalized patients.**

|              | 1-year Mortality  |        | 5-year Mortality  |         | 5-year Institutionalization |         | 5-year death/<br>institutionalization |         |
|--------------|-------------------|--------|-------------------|---------|-----------------------------|---------|---------------------------------------|---------|
|              | aHR(95%CI)        | p> z   | aHR(95%CI)        | p> z    | aHR(95%CI)                  | p> z    | aHR(95%CI)                            | p> z    |
| $\Delta$ mRS | 0=Reference       |        | 0=Reference       |         | 0=Reference                 |         | 0=Reference                           |         |
| <b>1</b>     | 3.76 (1.26-11.2)  | 0.018  | 1.92 (1.13-3.26)  | 0.016   | 2.82 (1.27-6.29)            | 0.011   | 2.16 (1.32-3.55)                      | 0.002   |
| <b>2</b>     | 4.56 (1.23-16.9)  | 0.023  | 1.83 (0.90-3.72)  | 0.097   | 5.99 (2.33-15.4)            | <0.0001 | 3.23 (1.70-6.17)                      | <0.0001 |
| <b>3</b>     | 10.1 (2.25-45.9)  | 0.003  | 4.02 (1.59-10.2)  | 0.003   | 17.0 (5.61-51.6)            | <0.0001 | 11.0 (4.66-26.2)                      | <0.0001 |
| <b>Age</b>   | 1.02 (0.97-1.07)  | 0.44   | 1.05 (1.02-1.08)  | 0.001   | 1.06 (1.02-1.11)            | 0.004   | 1.07 (1.04-1.10)                      | <0.0001 |
| <b>Male</b>  | 3.02 (1.28-7.11)  | 0.011  | 1.90 (1.21-2.97)  | 0.005   | 0.97 (0.50-1.87)            | 0.92    | 1.66 (1.08-2.54)                      | 0.020   |
| <b>NIHSS</b> | 1.04 (0.97-1.12)  | 0.29   | 1.05 (1.00-1.10)  | 0.049   | 1.03 (0.97-1.09)            | 0.38    | 1.05 (1.00-1.09)                      | 0.052   |
|              | p> X <sup>2</sup> | 0.0007 | p> X <sup>2</sup> | <0.0001 | p> X <sup>2</sup>           | <0.0001 | p> X <sup>2</sup>                     | <0.0001 |
|              | n                 | 187    | n                 | 187     | n                           | 184     | n                                     | 184     |

**Table III – Impact of the change in mRS from pre-stroke to 3-months post-stroke ( $\Delta$ mRS) on 1-year and 5-year mortality, institutionalization, and death/institutionalization for 3-month survivors of ischaemic stroke with pre-morbid mRS of 3 – controlling for age, sex, and National Institutes of Health Stroke Scale (NIHSS) score at acute presentation. The institutionalization analyses exclude pre-morbidly institutionalized patients.**

|              | 1-year Mortality  |         | 5-year Mortality  |         | 5-year Institutionalization |         | 5-year death/<br>institutionalization |         |
|--------------|-------------------|---------|-------------------|---------|-----------------------------|---------|---------------------------------------|---------|
|              | aHR(95%CI)        | p> z    | aHR(95%CI)        | p> z    | aHR(95%CI)                  | p> z    | aHR(95%CI)                            | p> z    |
| $\Delta$ mRS | 0=Reference       |         | 0=Reference       |         | 0=Reference                 |         | 0=Reference                           |         |
| <b>1</b>     | 2.62 (1.23-5.60)  | 0.013   | 1.32 (0.84-2.06)  | 0.23    | 2.60 (1.40-4.84)            | 0.003   | 1.88 (1.21-2.93)                      | 0.005   |
| <b>2</b>     | 5.25 (2.20-12.5)  | <0.0001 | 3.24 (1.79-5.86)  | <0.0001 | 3.49 (1.21-10.1)            | 0.021   | 3.36 (1.57-7.19)                      | 0.002   |
| <b>Age</b>   | 1.05 (1.01-1.10)  | 0.021   | 1.07 (1.04-1.10)  | <0.0001 | 1.11 (1.06-1.16)            | <0.0001 | 1.09 (1.06-1.12)                      | <0.0001 |
| <b>Male</b>  | 2.29 (1.26-4.17)  | 0.007   | 1.74 (1.18-2.56)  | 0.005   | 1.33 (0.76-2.32)            | 0.31    | 1.66 (1.13-2.43)                      | 0.010   |
| <b>NIHSS</b> | 1.03 (0.99-1.08)  | 0.14    | 1.02 (0.99-1.06)  | 0.23    | 1.05 (0.98-1.12)            | 0.18    | 1.05 (1.00-1.10)                      | 0.049   |
|              | p> X <sup>2</sup> | <0.0001 | p> X <sup>2</sup> | <0.0001 | p> X <sup>2</sup>           | <0.0001 | p> X <sup>2</sup>                     | <0.0001 |
|              | n                 | 176     | n                 | 176     | n                           | 154     | n                                     | 154     |

**Table IV – Impact of the change in mRS from pre-stroke to 3-months post-stroke ( $\Delta$ mRS) on 1-year and 5-year mortality, institutionalization, and death/institutionalization for 3-month survivors of ischaemic stroke with pre-morbid mRS of 4 – controlling for age, sex, and National Institutes of Health Stroke Scale (NIHSS) score at acute presentation. The institutionalization analyses exclude pre-morbidly institutionalized patients.**

|              | 1-year Mortality  |         | 5-year Mortality  |        | 5-year Institutionalization |        | 5-year death/<br>institutionalization |         |
|--------------|-------------------|---------|-------------------|--------|-----------------------------|--------|---------------------------------------|---------|
|              | aHR(95%CI)        | p> z    | aHR(95%CI)        | p> z   | aHR(95%CI)                  | p> z   | aHR(95%CI)                            | p> z    |
| $\Delta$ mRS | 0=Reference       |         | 0=Reference       |        | 0=Reference                 |        | 0=Reference                           |         |
| <b>1</b>     | 3.35 (1.03-10.9)  | 0.045   | 1.86 (0.72-4.79)  | 0.20   | 4.47 (1.24-16.1)            | 0.022  | 5.32 (1.72-16.5)                      | 0.004   |
| <b>Age</b>   | 1.00 (0.94-1.06)  | 1.00    | 1.04 (1.00-1.09)  | 0.04   | 1.00 (0.95-1.04)            | 0.92   | 1.02 (0.99-1.06)                      | 0.25    |
| <b>Male</b>  | 1.10 (0.32-3.75)  | 0.88    | 0.75 (0.33-1.72)  | 0.49   | 0.55 (0.19-1.64)            | 0.29   | 0.88 (0.99-1.06)                      | 0.75    |
| <b>NIHSS</b> | 1.09 (0.98-1.21)  | 0.11    | 1.08 (1.01-1.15)  | 0.03   | 1.01 (0.91-1.12)            | 0.82   | 1.01 (0.93-1.08)                      | 0.88    |
|              | p> X <sup>2</sup> | <0.0001 | p> X <sup>2</sup> | 0.0034 | p> X <sup>2</sup>           | 0.0770 | p> X <sup>2</sup>                     | <0.0001 |
|              | n                 | 47      | n                 | 47     | n                           | 42     | n                                     | 42      |

**Table V – Impact of the change in mRS from pre-stroke to 3-months post-stroke ( $\Delta$ mRS) on 5-year health and social care costs in 3-month ischaemic stroke survivors with pre-morbid mRS of 2-4.**

|                               | All                         |       | Pre-morbid mRS of 2         |       | Pre-morbid mRS of 3       |       | Pre-morbid mRS of 4         |      |
|-------------------------------|-----------------------------|-------|-----------------------------|-------|---------------------------|-------|-----------------------------|------|
|                               | Margins (\$, 95%CI)         | p> z  | Margins (\$)                | p> z  | Margins (\$)              | p> z  | Margins (\$)                | p> z |
| <b><math>\Delta</math>mRS</b> | 0=Reference                 |       | 0=Reference                 |       | 0=Reference               |       | 0=Reference                 |      |
| 1                             | 623<br>(-9,693-10,940)      | 0.91  | 11,013<br>(101-21,925)      | 0.048 | -8,372<br>(-24,567-7,824) | 0.31  | 21,724<br>(-37,880-81,327)  | 0.48 |
| 2                             | 24,918<br>(571-49,265)      | 0.015 | 53,377<br>(11,936-94,818)   | 0.012 | 7,151<br>(-23,685-37,987) | 0.65  | N/A                         |      |
| 3                             | 39,699<br>(-24,578-103,977) | 0.086 | 72,057<br>(-14,590-158,705) | 0.103 | N/A                       |       | N/A                         |      |
| <b>Age</b>                    | 446<br>(-66-958)            | 0.088 | 681<br>(22-1,339)           | 0.043 | 1,062<br>(94-2,029)       | 0.032 | -1,722<br>(-3,794-350)      | 0.10 |
| <b>Male</b>                   | -8,700<br>(-19,178-1,777)   | 0.10  | -7,844<br>(-19,894-4,205)   | 0.20  | -8,509<br>(-24,784-7,767) | 0.31  | -30,702<br>(-76,956-15,552) | 0.19 |
| <b>NIHSS</b>                  | -336<br>(-1,446-773)        | 0.55  | -746<br>(-2,308-815)        | 0.35  | -757<br>(-2,394-880)      | 0.37  | -722<br>(-4,256-2,811)      | 0.69 |
|                               | n                           | 410   | n                           | 187   | n                         | 176   | n                           | 47   |

**Table VI – Impact of the change in mRS from pre-stroke to 3-months post-stroke ( $\Delta$ mRS) on 5-year health and social care costs in 3-month ischaemic stroke survivors with pre-morbid mRS of 2-4, excluding pre-morbidly institutionalized patients (n=34) and censored patients (n=29, 2 of whom were already institutionalized).**

|                               | All                         |       | Pre-morbid mRS of 2         |       | Pre-morbid mRS of 3        |      | Pre-morbid mRS of 4         |      |
|-------------------------------|-----------------------------|-------|-----------------------------|-------|----------------------------|------|-----------------------------|------|
|                               | Margins (\$, 95%CI)         | p> z  | Margins (\$)                | p> z  | Margins (\$)               | p> z | Margins (\$)                | p> z |
| <b><math>\Delta</math>mRS</b> | 0=Reference                 |       | 0=Reference                 |       | 0=Reference                |      | 0=Reference                 |      |
| 1                             | 5,731<br>(-5,822-16,564)    | 0.35  | 10,387<br>(-1,266-22,040)   | 0.081 | -779<br>(-18,148-16,590)   | 0.93 | 39,119<br>(-41,230-119,468) | 0.34 |
| 2                             | 38,014<br>(5,628-70,401)    | 0.021 | 55,619<br>(11,683-99,555)   | 0.013 | 20,928<br>(-20,911-62,766) | 0.33 | N/A                         |      |
| 3                             | 54,762<br>(-28,758-138,281) | 0.20  | 73,492<br>(-17,802-164,786) | 0.12  | N/A                        |      | N/A                         |      |
| <b>Age</b>                    | 216<br>(-299-731)           | 0.41  | 732<br>(23.9-1,440)         | 0.043 | 611<br>(-349-1,571)        | 0.21 | -1,760<br>(-3,937-418)      | 0.11 |
| <b>Male</b>                   | -8,874<br>(-19,857-2,109)   | 0.11  | -9,473<br>(-22,432-3,485)   | 0.15  | -7,624<br>(-24,407-9,159)  | 0.37 | -35,849<br>(-89,902-18,204) | 0.19 |
| <b>NIHSS</b>                  | -991<br>(-2,260-279)        | 0.13  | -783<br>(-2,492-926)        | 0.37  | -1,455<br>(-3,321-410)     | 0.13 | -2,218<br>(-5,909-1,472)    | 0.24 |
|                               | n                           | 355   | n                           | 167   | n                          | 147  | n                           | 41   |

## SUPPLEMENTARY FIGURES

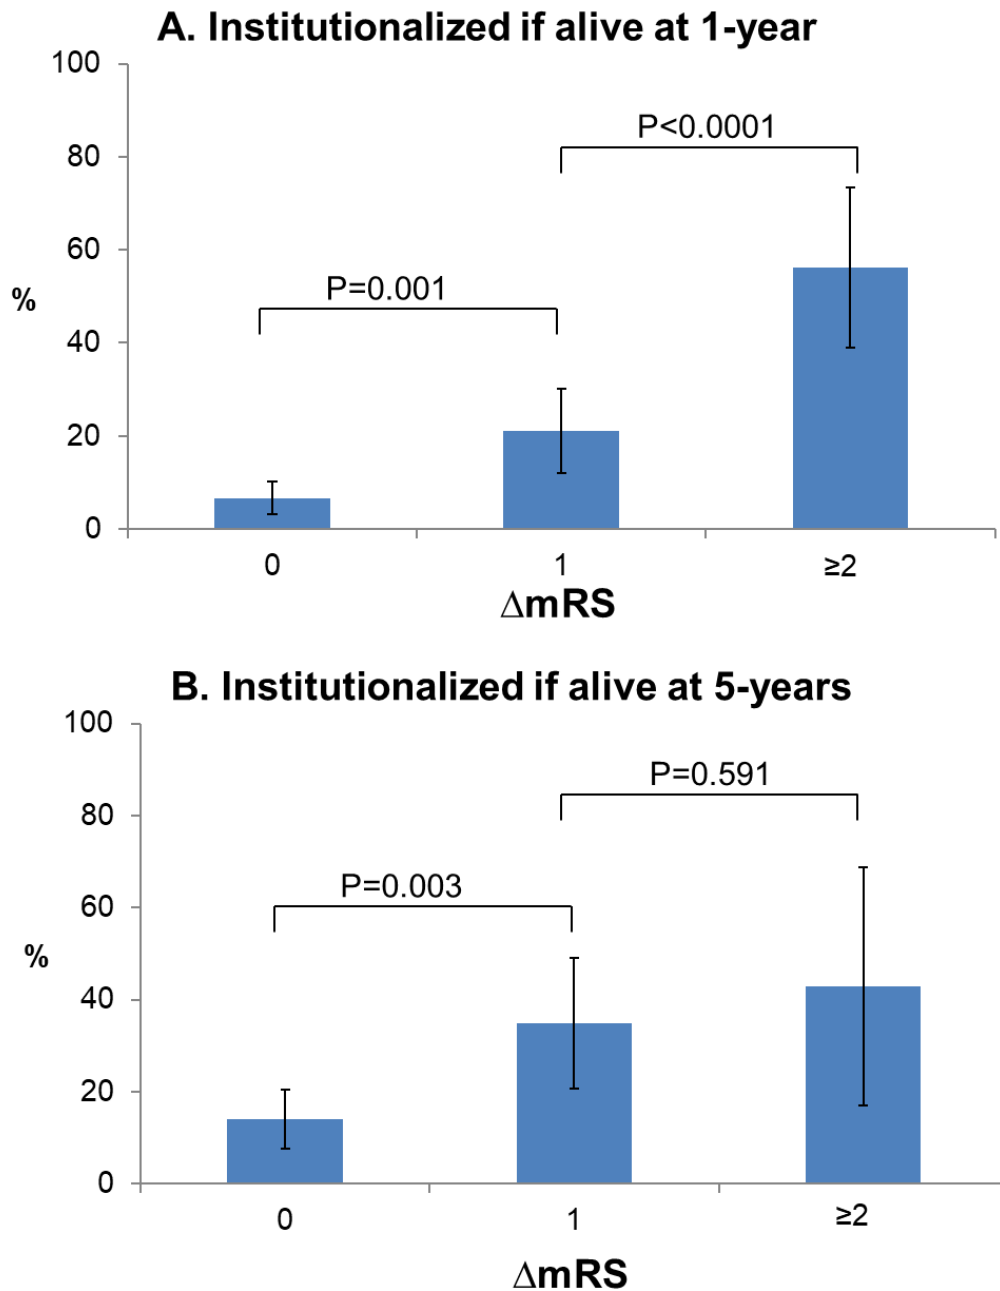

**Figure I. 1-year and 5-year institutionalization outcomes in survivors of ischaemic stroke with pre-morbid mRS of 2-4, stratified by the change in mRS between pre-stroke and 3-months post-stroke ( $\Delta mRS$ ).** The graphs show the proportion of 3-month survivors, also alive at (A) 1-year, who were institutionalized by 1-year post-stroke, and (B) also alive at 5-years, who were institutionalized by 5-years post-stroke. Institutionalization was defined as admission to a nursing or residential care home. The P-values from chi-squared tests for differences between mRS grades are indicated. Bars represent 95% confidence intervals.

### A. 5-year mortality

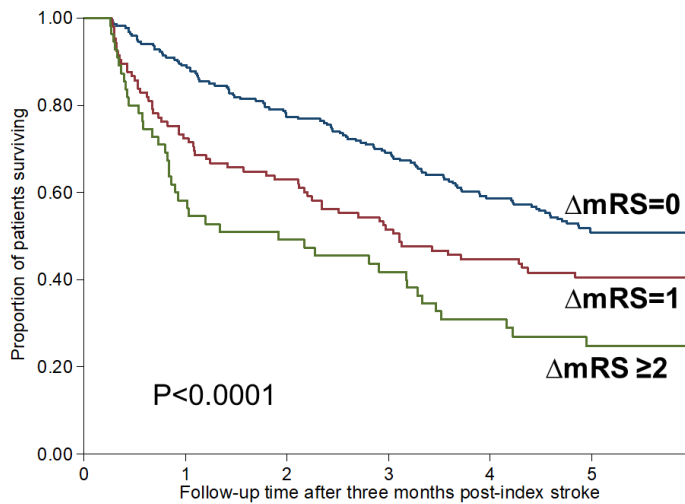

### B. 5-year institutionalization

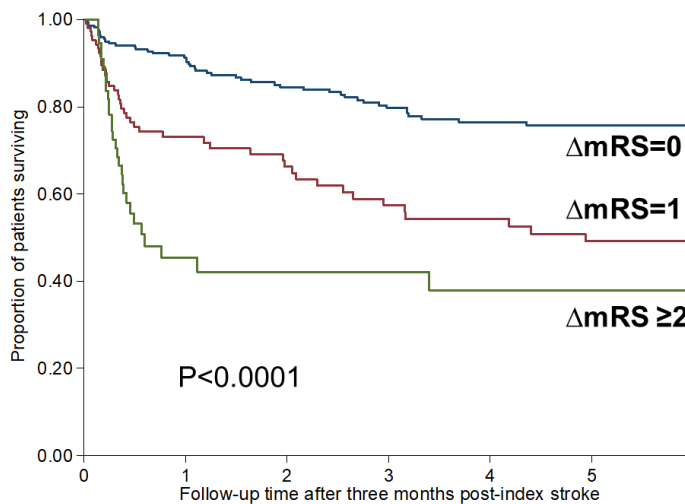

### C. 5-year death/institutionalization

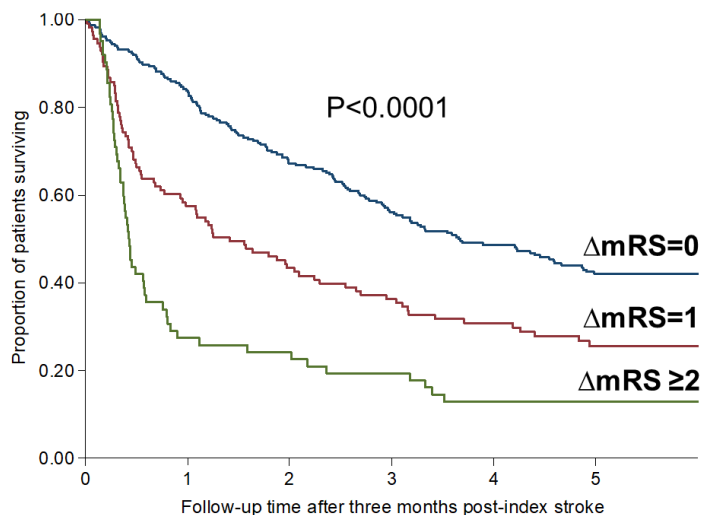

**Figure II. Kaplan-Meier survival curves after index stroke for 3-month survivors with pre-morbid mRS of 2-4, stratified by the change in mRS between pre-stroke and 3-months post-stroke ( $\Delta mRS$ ), for (A) 5-year mortality, (B) 5-year institutionalization, and (C) 5-year mortality/institutionalization. Since only 3-month survivors with a pre-morbid mRS of 2 could have a  $\Delta mRS$  of 3, we combined them with patients with a pre-morbid mRS of 3 who had a  $\Delta mRS$  of 2 (" $\Delta mRS \geq 2$ "). P-values from log-rank test for each group are shown.**
